# Supplementary material for: The Male Reproductive System of the Kissing Bug, Rhodnius prolixus Stål, 1859 (Hemiptera: Reduviidae: Triatominae): Arrangements of the Muscles and the Myoactivity of the Selected Neuropeptides
Source: MDPI journal article supplement (doi:10.3390/insects14040324), 2023-03-28
Supplement: s1 [file s1]

## Supporting Information for

# The Male Reproductive System of the Kissing Bug, *Rhodnius prolixus* Stål, 1859 (Hemiptera: Reduviidae: Triatominae): Arrangements of the Muscles and the Myoactivity of the Selected Neuropeptides

Angela B. Lange \*, Anika Kisana, Jimena Leyria and Ian Orchard

\* Correspondence: angela.lange@utoronto.ca

Supplementary Table S1. Primers used for qPCR.

| Gene code  | Primers to qPCR         | Sequence (5→3)            |
|------------|-------------------------|---------------------------|
| KC004226.1 | Myosuppressin R_forward | CTCTGTGGCCAATCTGCTCA      |
|            | Myosuppressin R_reverse | TCCATCCGTAGGTGTAGCGA      |
| RPRC001551 | FMRFamide R_forward     | ATGTGATGGTGGCGTTAGGG      |
|            | FMRFamide R_reverse     | GCTCTGGCTGCTCGTTTTAC      |
| RPRC015267 | Proctolin R_forward     | TGGTTGGGGCAACATCCTAC      |
|            | Proctolin R_reverse     | TTCGTACTGCAGCCACTAGC      |
| RPRC009875 | Actin_forward           | AGAGAAAAGATGACGCAGATAATGT |
|            | Actin_reverse           | ATATCCCTAACAATTTACGTTTCG  |
| RPRC014419 | Rp49_forward            | GTGAAACTCAGGAGAAATTGGC    |
|            | Rp49_reverse            | AGGACACACCATGCGCTATC      |
